# Supplementary material for: Polymorphism of vanillin revisited: the discovery and selective crystallization of a rare crystal structure
Source: Royal Society of Chemistry journal article supplement (doi:10.1039/c5ce00568j), 2015-05-19
Supplement: c5ce00568j1.pdf [file c5ce00568j1.pdf]

## Supplementary information

### Polymorphism of Vanillin Revisited: The Discovery and Selective Crystallization of a Rare Crystal Structure

Padmini Kavuru<sup>a</sup>, Stephanie J. Grebinoski<sup>a</sup>, Mitulkumar A. Patel<sup>a</sup>, Lukasz Wojtas<sup>b</sup>, and Keith Chadwick<sup>a\*</sup>

<sup>a</sup> Department of Industrial and Physical Pharmacy, College of Pharmacy, Purdue University, 575 Stadium Mall Dr, West Lafayette, IN, USA-47907.

*Tel: 765-496-2775, Fax: 765-494-6545*

\* Corresponding author; email: [chadwick@purdue.edu](mailto:chadwick@purdue.edu)

<sup>b</sup> Department of Chemistry, College of Arts and Science, University of South Florida, Tampa, FL-33620.

### Table of contents

X-ray Crystallography information

Table S1. Hydrogen Bonds for vanillin Form II.

Table S2. Crystal data and structure refinement for vanillin Form II

Fig. S1: Comparison of calculated PXRD patterns of vanillin Form I crystal structures reported by Natarajan et al. (YUHTEA) and Nieger (YUHTEA01).

Fig. S2: PXRD patterns of calculated FI and FII of vanillin and its comparison to the PXRD patterns of vanillin crystals obtained from Isopropyl alcohol, water, ethanol, acetonitrile, acetone.

Fig. S3: Hydrogen bonding patterns among vanillin molecules in crystal structure of Form I (YUHTEA).

Fig. S4: DSC traces showing melting point of vanillin Forms I and II.

Fig. S5: PXRD patterns of vanillin crystals obtained by slow evaporation from Isopropyl alcohol in presence of PAA, PMMA, and PEG.

Fig. S6: SEM image of vanillin Form I crystallized on PEG by slow evaporation

Fig. S7: PXRD patterns of vanillin crystals obtained by cooling crystallization from Isopropyl alcohol in presence of PAA, PMMA, and PEG.

## X-ray Crystallography information

The X-ray diffraction data were measured on a Bruker D8 Venture PHOTON 100 CMOS system equipped with a Cu K $\alpha$  INCOATEC Imus micro-focus source ( $\lambda = 1.54178$  Å). The crystal was kept at 100(2) K during data collection. Indexing was performed using APEX2.<sup>1</sup> (Difference Vectors method). Data integration and reduction were performed using SaintPlus 6.01.<sup>2</sup> Absorption correction was performed by multi-scan method implemented in SADABS.<sup>3</sup> Space groups were determined using XPREP implemented in APEX2.<sup>1</sup> The structure was solved using SHELXS-97 (direct methods) and refined using SHELXL-2013<sup>7</sup> (full-matrix least-squares on F<sup>2</sup>) contained in APEX2<sup>1,7</sup>, WinGX v1.70.01<sup>4-7</sup> and OLEX2.<sup>7,8</sup> All non-hydrogen atoms were refined anisotropically. H9 Hydrogen atom of hydroxyl group has been found from difference Fourier map and was freely refined with Uiso(H) = 1.5Ueq(-OH). The remaining hydrogen atoms of -OH groups as well as -CHO groups have been found from difference Fourier map and were freely refined. All other hydrogen atoms (of -CH, -CH<sub>2</sub> and -CH<sub>3</sub> groups) were placed in geometrically calculated positions and included in the refinement process using riding model with isotropic thermal parameters: Uiso(H) = 1.2Ueq(-CH, -CH<sub>2</sub>) and Uiso(H) = 1.5Ueq(-CH<sub>3</sub>).

**Table S1. Hydrogen Bonds for vanillin Form II.**

| D   | H   | A                 | d(D-H)/Å | d(H-A)/Å | d(D-A)/°  | D-H-A/° |
|-----|-----|-------------------|----------|----------|-----------|---------|
| O9  | H9  | O7 <sup>i</sup>   | 1.07 (4) | 1.69 (4) | 2.681 (3) | 151 (3) |
| O6  | H6  | O3 <sup>ii</sup>  | 1.03 (5) | 1.81 (5) | 2.712 (3) | 144 (4) |
| O8  | H8  | O9 <sup>iii</sup> | 0.97 (6) | 1.96 (6) | 2.806 (3) | 144 (5) |
| O10 | H10 | O6 <sup>iv</sup>  | 0.85 (5) | 2.10 (5) | 2.794 (3) | 139 (4) |

Symmetry operations: (i)  $-1/2+X, 1/2-Y, +Z$ ; (ii)  $1/2+X, 3/2-Y, +Z$ ; (iii)  $1/2-X, 1/2+Y, 1/2+Z$ ; (iv)  $+X, -1+Y, +Z$

**Table S2. Crystal data and structure refinement for vanillin Form II**

|                                             |                                              |
|---------------------------------------------|----------------------------------------------|
| Empirical formula                           | C <sub>8</sub> H <sub>8</sub> O <sub>3</sub> |
| Formula weight                              | 152.14                                       |
| Temperature/K                               | 100 (2)                                      |
| Crystal system                              | Orthorhombic                                 |
| Space group                                 | <i>Pna2<sub>1</sub></i>                      |
| a/Å                                         | 16.397 (7)                                   |
| b/Å                                         | 3.810 (1)                                    |
| c/Å                                         | 45.645 (2)                                   |
| $\alpha$ /°                                 | 90                                           |
| $\beta$ /°                                  | 90                                           |
| $\gamma$ /°                                 | 90                                           |
| Volume/Å <sup>3</sup>                       | 2851.61 (19)                                 |
| Z                                           | 16                                           |
| Z'                                          | 4                                            |
| $\rho$ calc mg/mm <sup>3</sup>              | 1.418                                        |
| $\mu$ /mm <sup>-1</sup>                     | 0.918                                        |
| F(000)                                      | 1280.0                                       |
| Crystal size/mm <sup>3</sup>                | 0.11 × 0.04 × 0.02                           |
| Radiation                                   | CuK $\alpha$ ( $\lambda$ = 1.54178)          |
| 2 $\theta$ range for data collection        | 7.748 to 144.68°                             |
| Index ranges                                | -20 ≤ h ≤ 20, -4 ≤ k ≤ 4, -56 ≤ l ≤ 54       |
| Reflections collected                       | 14594                                        |
| Independent reflections                     | 5340 [Rint = 0.0521, Rsigma = 0.0485]        |
| Data/restraints/parameters                  | 5340/1/432                                   |
| Goodness-of-fit on F <sup>2</sup>           | 1.028                                        |
| Final R indexes [I ≥ 2 $\sigma$ (I)]        | R1 = 0.0387, wR2 = 0.0887                    |
| Final R indexes [all data]                  | R1 = 0.0465, wR2 = 0.0925                    |
| Largest diff. peak/hole / e Å <sup>-3</sup> | 0.18/-0.23                                   |
| Flack parameter 0.12 (10)                   | Flack parameter 0.12 (10)                    |

**Fig. S1: Comparison of calculated PXRD patterns of vanillin Form I crystal structures reported by Natarajan et al. (YUHTEA) and Nieger (YUHTEA01).**

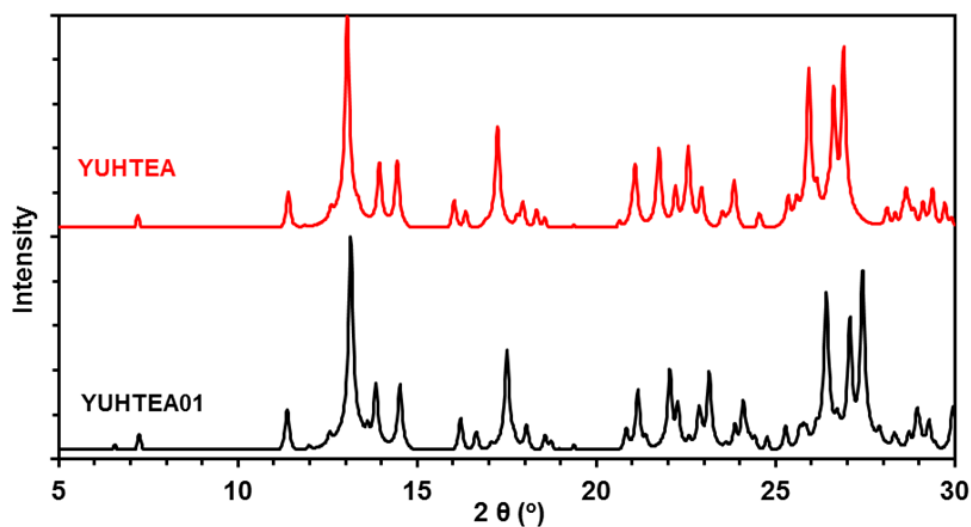

**Fig. S2: PXRD patterns of calculated FI and FII of vanillin and its comparison to the PXRD patterns of vanillin crystals obtained from Isopropyl alcohol, water, ethanol, acetonitrile, acetone.**

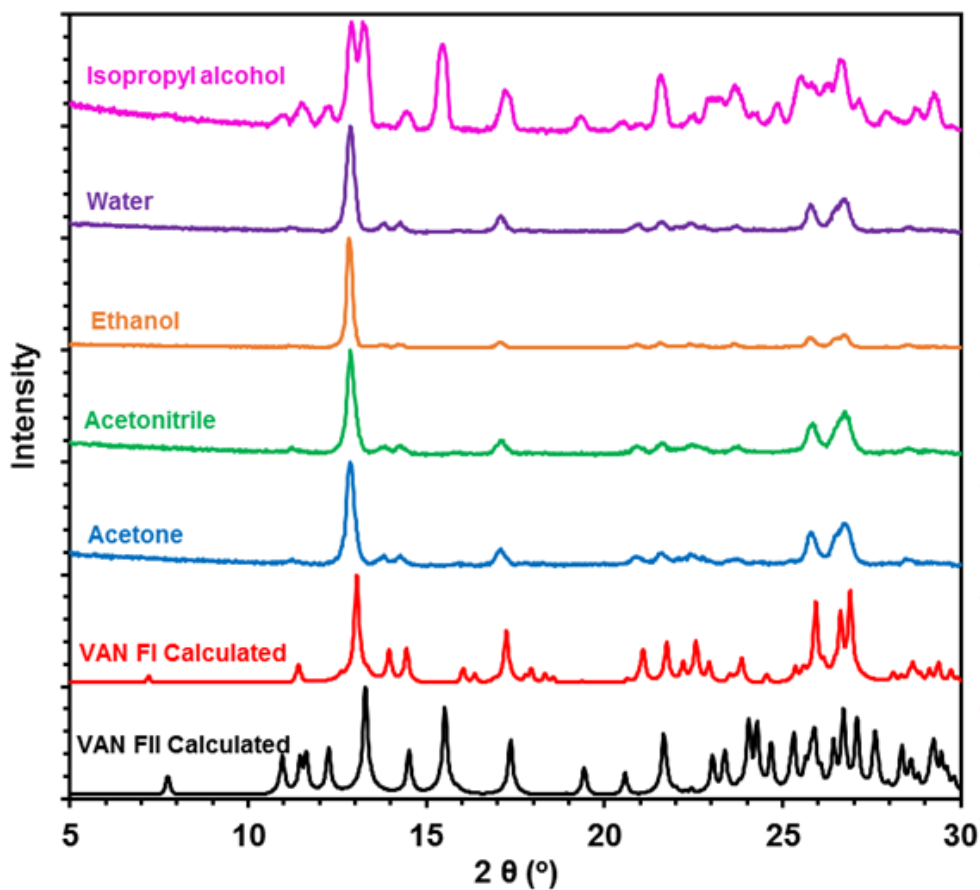

**Fig. S3: Illustration of (a) hydrogen bonding in vanillin Form I; (b) lateral interactions in vanillin tapes in Form I (CSD ref code: YUHTEA).**

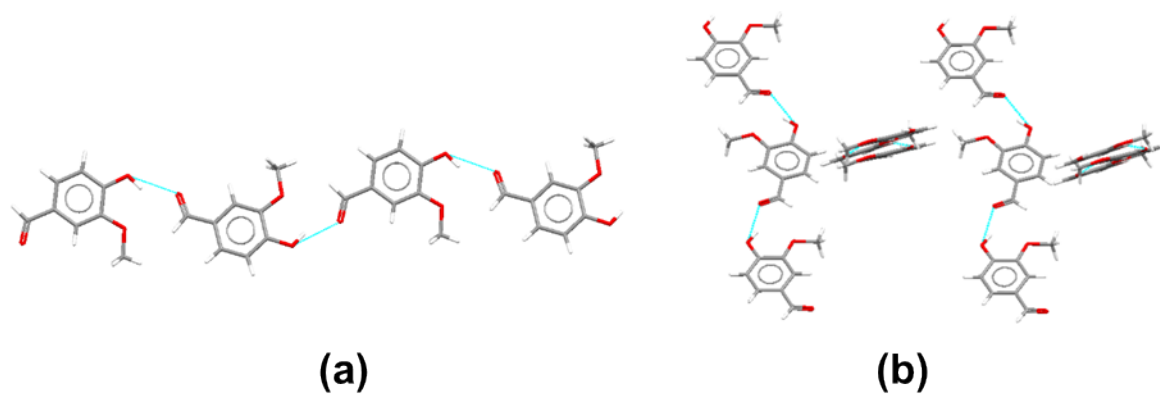

**Fig. S4: DSC traces showing melting points of vanillin Forms I (red) and Form II (green).**

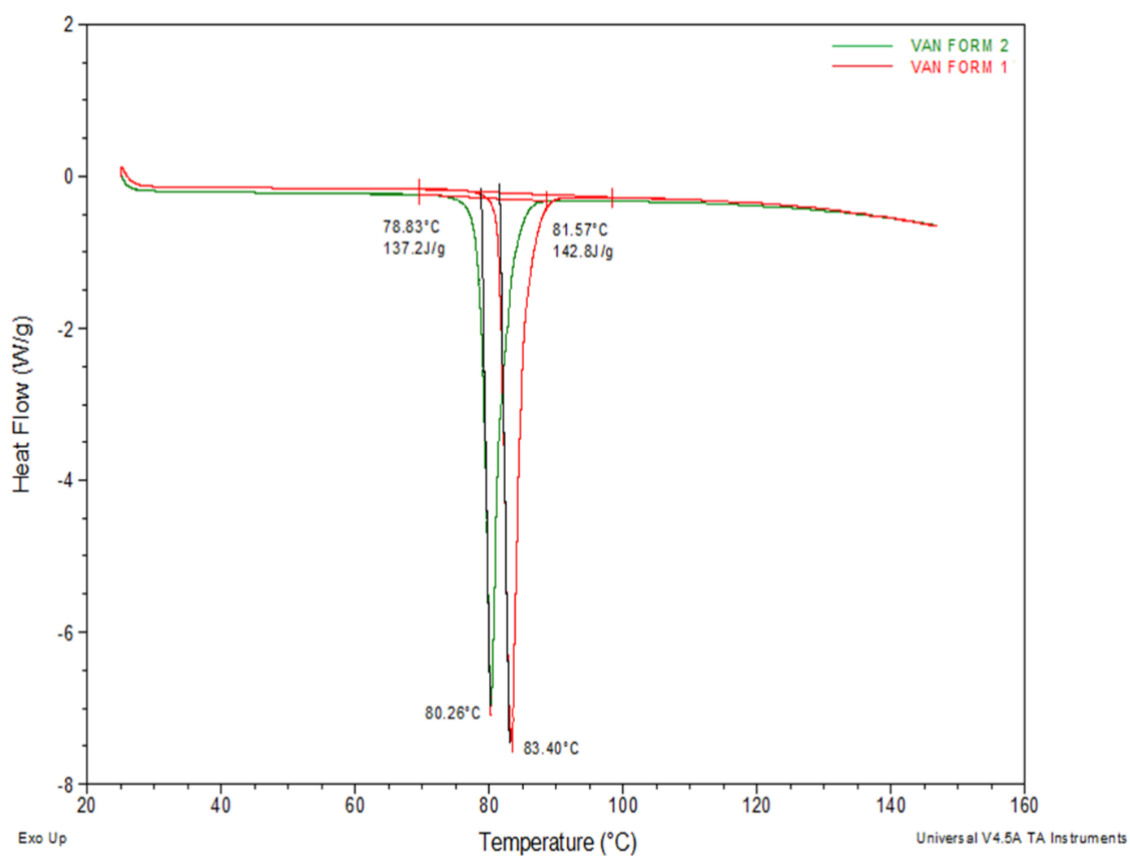

**Fig. S5: PXRD patterns of vanillin crystals obtained from slow evaporation of Isopropyl alcohol in presence of PAA, PMMA, and PEG.**

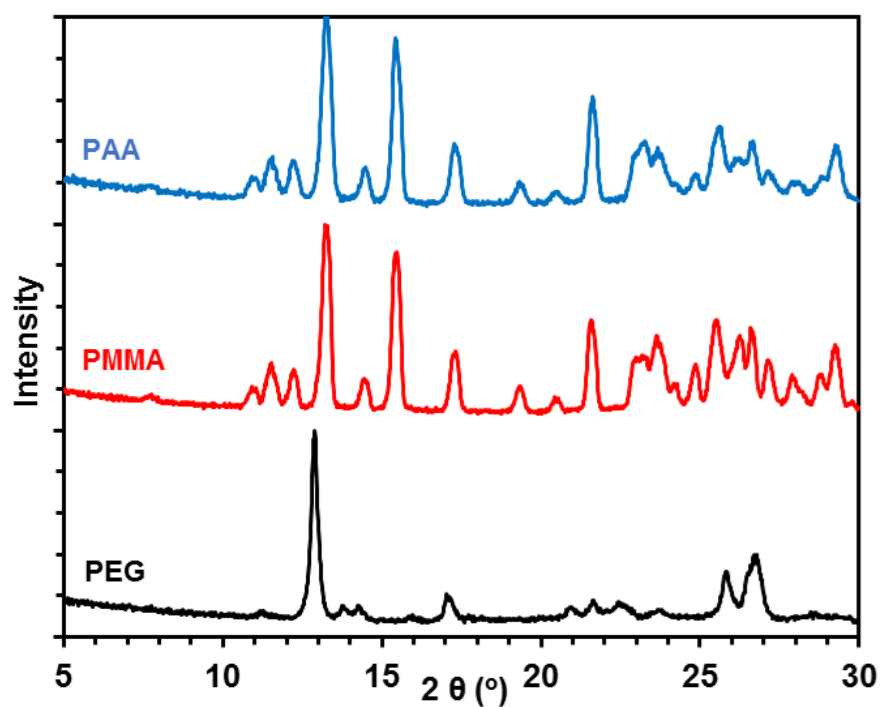

**Fig. S6: SEM image of vanillin Form I crystallized in presence of PEG by slow evaporation**

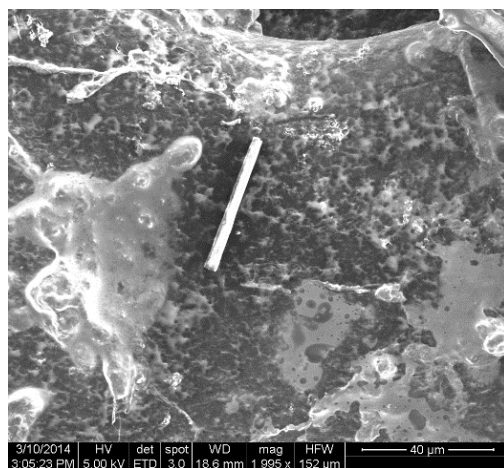

**Fig. S7: PXRD patterns of vanillin crystals obtained by cooling crystallization from Isopropyl alcohol in presence of PAA, PMMA, and PEG.**

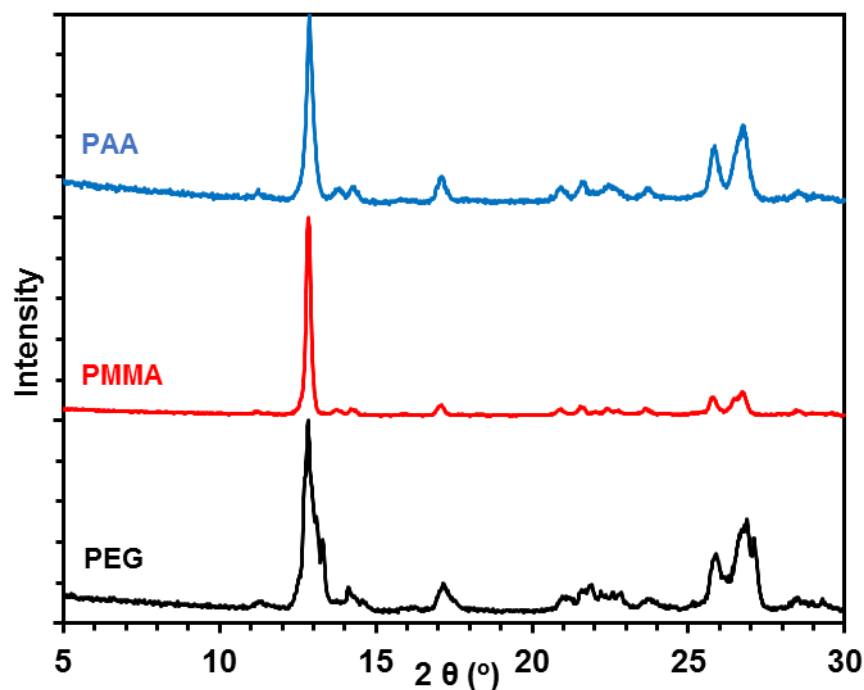

#### References:

1. Bruker (2013). APEX2 (Version 2013.6-2). Bruker AXS Inc., Madison, Wisconsin, USA.
2. Bruker (2013). SAINT-V8.32A. Data Reduction Software.
3. Sheldrick, G. M. (1996). SADABS. Program for Empirical Absorption Correction. University of Gottingen, Germany.
4. Farrugia L. *J. Appl. Cryst.* 1999, **32**, 837-838.
5. Sheldrick, G.M. (1997) SHELXL-97. Program for the Refinement of Crystal
6. Sheldrick, G.M. *Acta Cryst.* 1990, **A46**, 467-473
7. Sheldrick, G. M. *Acta Cryst.* 2008, **A64**, 112-122.
8. Dolomanov, O.V.; Bourhis, L.J.; Gildea, R.J.; Howard, J.A.K.; Puschmann, H., OLEX2: A complete structure solution, refinement and analysis program. *J. Appl. Cryst.* 2009, **42**, 339-341.
